**Table S1: Protein identification with estimated and predicted molecular mass (kDa), isoelectric point (pI), GenBank identifier, MASCOT score, number of peptides matched, sequence coverage, and putative functional category.**

| Spot ID | Protein ID                               | A | HS | I | Estimated MW | Estimated pI | Predicted MW | Predicted pI | GenBank ID   | Mascot Score | Peptide Matches | Sequence Coverage | Functional Category |
|---------|------------------------------------------|---|----|---|--------------|--------------|--------------|--------------|--------------|--------------|-----------------|-------------------|---------------------|
| 3       | Paramyosin (long form)                   | ✓ |    |   | 69           | 6.40         | 103.02       | 5.46         | isotig00035  | 77           | 3               | 1%                | Thick filament      |
| 4       | Arginine kinase                          | ✓ |    |   | 35           | 5.93         | 39.96        | 6.05         | gi 170186144 | 170          | 5               | 20%               | Phosphotransfer     |
| 5       | Arginine kinase                          |   | ✓  |   | 31           | 6.47         | 39.96        | 6.05         | gi 170187671 | 391          | 8               | 42%               | Phosphotransfer     |
| 6       | Cardiac-like muscle actin                | ✓ |    |   | 31           | 6.03         | 41.65        | 5.23         | gi 170182268 | 167          | 3               | 14%               | Thin filament       |
| 7       | Arginine kinase                          | ✓ |    |   | 28           | 6.58         | 39.96        | 6.05         | gi 170186144 | 294          | 7               | 29%               | Phosphotransfer     |
| 8       | Glyceraldehyde-3-phosphate dehydrogenase | ✓ |    |   | 28           | 6.24         | 18.66        | 5.58         | gi 170197231 | 86           | 3               | 21%               | Energy metabolism   |
| 9       | Phosphatidylethanolamine-binding protein | ✓ |    |   | 28           | 6.00         | 20.36        | 6.07         | gi 170189936 | 127          | 3               | 11%               | Signaling           |
| 10      | Hemocyanin                               | ✓ |    |   | 27           | 6.94         | 76.32        | 5.83         | gi 170187274 | 201          | 5               | 17%               | Respiratory         |
| 11      | Peroxiredoxin 5 isoform B                | ✓ |    |   | 25           | 6.78         | 19.88        | 8.88         | gi 170265337 | 205          | 3               | 28%               | Signaling           |
| 12      | Hemocyanin                               | ✓ |    |   | 25           | 6.76         | 76.32        | 5.83         | gi 170187274 | 275          | 6               | 26%               | Respiratory         |
| 13      | αβ-Actin                                 | ✓ |    |   | 23           | 5.78         | 41.91        | 5.16         | gi 170182624 | 321          | 5               | 24%               | Thin filament       |
| 17      | Gelsolin                                 | ✓ |    |   | 18           | 5.67         | 81.77        | 4.79         | gi 170227754 | 273          | 3               | 20%               | Actin-binding       |
| 18      | Gelsolin                                 | ✓ |    |   | 18           | 5.38         | 81.77        | 4.79         | gi 170227754 | 358          | 4               | 25%               | Actin-binding       |
| 21      | FK506-binding protein                    | ✓ |    |   | 12           | 6.76         | 11.69        | 7.87         | gi 170246946 | 102          | 1               | 23%               | Signaling           |
| 22      | Profilin                                 | ✓ |    |   | 9            | 6.76         | 13.89        | 6.27         | gi 170182510 | 279          | 4               | 34%               | Actin-binding       |
| 23      | Arginine kinase                          | ✓ |    |   | 46           | 6.66         | 39.96        | 6.05         | gi 170186144 | 385          | 9               | 35%               | Phosphotransfer     |
| 25      | Paramyosin                               | ✓ |    |   | 16           | 5.94         | 103.02       | 5.46         | isotig00035  | 38           | 2               | 0%                | Thick filament      |
| 26      | Myosin heavy chain type B                | ✓ |    |   | 14           | 6.09         | 218.87       | 6.00         | gi 170270277 | 158          | 3               | 13%               | Thick filament      |
| 27      | Myosin heavy chain type B                | ✓ |    |   | 13           | 6.08         | 218.87       | 6.00         | gi 170270277 | 100          | 2               | 5%                | Thick filament      |
| 29      | Cardiac-like muscle actin                | ✓ |    |   | 12           | 6.27         | 41.65        | 5.23         | gi 170182268 | 172          | 2               | 11%               | Thin filament       |
| 30      | Prostaglandin reductase                  | ✓ |    |   | 19           | 5.84         | 36.49        | 8.31         | gi 170218863 | 68           | 2               | 7%                | Signaling           |
| 32      | Phosphohistidine phosphatase 1           | ✓ |    |   | 11           | 6.39         | 13.82        | 5.34         | gi 170217426 | 155          | 2               | 13%               | Signaling           |
| 33      | Cofilin                                  | ✓ |    |   | 19           | 6.45         | 19.34        | 8.50         | isotig01165  | 201          | 5               | 11%               | Actin-binding       |
| 34      | αβ-Actin                                 | ✓ |    |   | 17           | 6.27         | 41.91        | 5.16         | gi 170182624 | 184          | 4               | 20%               | Thin filament       |
| 35      | αβ-Actin                                 | ✓ |    |   | 17           | 6.29         | 41.91        | 5.16         | gi 170182624 | 193          | 3               | 16%               | Thin filament       |
| 36      | Glyceraldehyde-3-phosphate dehydrogenase | ✓ |    |   | 15           | 6.44         | 18.66        | 5.58         | gi 170197231 | 336          | 5               | 29%               | Energy metabolism   |
| 37      | Hemocyanin                               | ✓ |    |   | 24           | 6.30         | 75.27        | 5.52         | gi 170187274 | 109          | 2               | 9%                | Respiratory         |
| 38      | Myosin heavy chain type B                | ✓ |    |   | 16           | 6.10         | 218.87       | 6.00         | gi 170270277 | 99           | 2               | 5%                | Thick filament      |
| 39      | αβ-Actin                                 | ✓ |    |   | 14           | 6.26         | 41.91        | 5.16         | gi 170182624 | 270          | 3               | 16%               | Thin filament       |
| 40      | Cardiac-like muscle actin                | ✓ |    |   | 21           | 6.22         | 41.65        | 5.23         | gi 170182268 | 96           | 2               | 8%                | Thin filament       |
| 42      | Cardiac-like muscle actin                | ✓ |    |   | 13           | 6.31         | 41.65        | 5.23         | gi 170182268 | 191          | 2               | 11%               | Thin filament       |
| 46      | Filamin-A                                | ✓ |    |   | 68           | 6.87         | 267.69       | 5.81         | isotig02107  | 54           | 2               | 3%                | Actin-binding       |
| 49      | Filamin-C                                | ✓ |    |   | 63           | 6.68         | 262.65       | 5.90         | gi 170202097 | 98           | 2               | 8%                | Actin-binding       |
| 50      | Enolase                                  | ✓ |    |   | 55           | 6.68         | 39.85        | 5.45         | gi 170254092 | 181          | 3               | 16%               | Energy metabolism   |
| 51      | Enolase                                  | ✓ |    |   | 54           | 6.79         | 47.24        | 6.18         | gi 170237664 | 202          | 3               | 14%               | Energy metabolism   |
| 52      | αβ-Actin                                 | ✓ |    |   | 36           | 5.76         | 41.91        | 5.16         | gi 170182624 | 390          | 6               | 27%               | Thin filament       |
| 53      | Myosin regulatory light chain            | ✓ |    |   | 24           | 4.19         | 22.58        | 4.70         | gi 170184074 | 281          | 5               | 11%               | Thick filament      |
| 57      | Hemocyanin                               | ✓ |    |   | 79           | 6.01         | 75.27        | 5.52         | gi 170278434 | 153          | 3               | 15%               | Respiratory         |
| 58      | Hemocyanin                               | ✓ |    |   | 78           | 6.06         | 77.54        | 5.37         | gi 170185161 | 122          | 3               | 14%               | Respiratory         |
| 59      | Hemocyanin                               | ✓ |    |   | 79           | 6.10         | 75.27        | 5.52         | gi 170278434 | 128          | 2               | 10%               | Respiratory         |
| 62      | Pseudohemocyanin-1                       | ✓ |    |   | 56           | 5.27         | 79.57        | 5.69         | gi 170189674 | 60           | 2               | 9%                | Respiratory         |
| 67      | Proteasome β-subunit type-6-like         | ✓ |    |   | 24           | 6.71         | 25.10        | 5.41         | gi 170204742 | 46           | 2               | 6%                | Signaling           |
| 70      | Glyceraldehyde-3-phosphate dehydrogenase | ✓ |    |   | 15           | 6.79         | 35.54        | 6.54         | gi 170198680 | 147          | 3               | 15%               | Energy metabolism   |
| 71      | Myosin heavy chain type B                | ✓ |    |   | 13           | 6.68         | 218.87       | 6.00         | gi 170270277 | 82           | 2               | 5%                | Thick filament      |
| 73      | Glyceraldehyde-3-phosphate dehydrogenase | ✓ |    |   | 17           | 6.52         | 18.66        | 5.58         | gi 170197231 | 318          | 5               | 29%               | Energy metabolism   |
| 74      | Glyceraldehyde-3-phosphate dehydrogenase | ✓ |    |   | 16           | 6.45         | 18.66        | 5.58         | gi 170197231 | 48           | 2               | 15%               | Energy metabolism   |
| 75      | Glyceraldehyde-3-phosphate dehydrogenase | ✓ |    |   | 23           | 6.56         | 18.66        | 5.58         | gi 170197231 | 253          | 3               | 18%               | Energy metabolism   |
| 78      | αβ-Actin                                 | ✓ |    |   | 57           | 4.62         | 41.91        | 5.16         | gi 170190957 | 77           | 2               | 5%                | Thin filament       |
| 79      | αβ-Actin                                 | ✓ |    |   | 51           | 5.28         | 41.91        | 5.16         | gi 170190957 | 390          | 7               | 21%               | Thin filament       |
| 80      | αβ-Actin                                 | ✓ |    |   | 53           | 5.12         | 41.91        | 5.16         | gi 170190957 | 172          | 4               | 12%               | Thin filament       |
| 81      | αβ-Actin                                 | ✓ |    |   | 45           | 4.97         | 41.91        | 5.16         | gi 170190957 | 439          | 7               | 21%               | Thin filament       |
| 82      | αβ-Actin                                 | ✓ |    |   | 54           | 6.64         | 41.91        | 5.16         | gi 170190957 | 419          | 6               | 18%               | Thin filament       |
| 83      | Farnesoic acid O-methyltransferase       | ✓ |    |   | 43           | 4.56         | 31.45        | 4.56         | gi 170188611 | 178          | 3               | 14%               | Signaling           |
| 84      | αβ-Actin                                 | ✓ |    |   | 39           | 4.85         | 41.91        | 5.16         | gi 170190957 | 132          | 2               | 9%                | Thin filament       |
| 85      | αβ-Actin                                 | ✓ |    |   | 37           | 4.84         | 41.91        | 5.16         | gi 170190957 | 400          | 6               | 21%               | Thin filament       |
| 86      | Sarcomeric α-actinin                     | ✓ |    |   | 35           | 4.84         | 97.75        | 6.04         | gi 170222152 | 132          | 6               | 30%               | Actin-binding       |
| 87      | Glycogen phosphorylase                   | ✓ |    |   | 33           | 5.46         | 97.96        | 6.82         | gi 170202348 | 147          | 5               | 17%               | Energy metabolism   |
| 88      | αβ-Actin                                 | ✓ |    |   | 32           | 5.56         | 41.91        | 5.16         | gi 170182624 | 210          | 4               | 20%               | Thin filament       |

Table S1 continued

|     |                                             |   |    |      |        |      |              |     |   |     |                   |
|-----|---------------------------------------------|---|----|------|--------|------|--------------|-----|---|-----|-------------------|
| 89  | Arginine kinase                             | ✓ | 31 | 5.71 | 40.34  | 6.34 | gj 170183164 | 258 | 5 | 18% | Phosphotransfer   |
| 90  | Arginine kinase                             | ✓ | 29 | 5.45 | 40.34  | 6.34 | gj 170183164 | 221 | 5 | 18% | Phosphotransfer   |
| 91  | Arginine kinase                             | ✓ | 29 | 5.42 | 40.34  | 6.34 | gj 170183164 | 81  | 2 | 6%  | Phosphotransfer   |
| 92  | $\alpha/\beta$ -Actin                       | ✓ | 28 | 5.43 | 41.91  | 5.16 | gj 170182624 | 198 | 4 | 18% | Thin filament     |
| 94  | Sarcoplasmic calcium-binding protein        | ✓ | 22 | 4.68 | 21.93  | 4.60 | gj 170182977 | 168 | 3 | 14% | Signaling         |
| 95  | Sarcoplasmic calcium-binding protein        | ✓ | 21 | 4.70 | 21.93  | 4.60 | gj 170182977 | 161 | 3 | 14% | Signaling         |
| 96  | Myosin regulatory light chain               | ✓ | 46 | 6.86 | 22.58  | 4.70 | gj 170184074 | 273 | 5 | 11% | Thick filament    |
| 99  | $\alpha/\beta$ -Actin                       | ✓ | 46 | 5.22 | 41.91  | 5.16 | gj 170190957 | 257 | 4 | 9%  | Thin filament     |
| 100 | Arginine kinase                             | ✓ | 17 | 5.23 | 46.00  | 4.90 | gj 170183164 | 283 | 5 | 23% | Phosphotransfer   |
| 101 | Arginine kinase                             | ✓ | 22 | 5.39 | 46.00  | 4.90 | gj 170183164 | 202 | 4 | 15% | Phosphotransfer   |
| 102 | Arginine kinase                             | ✓ | 19 | 5.48 | 46.00  | 4.90 | gj 170183164 | 135 | 3 | 11% | Phosphotransfer   |
| 103 | 14-3-3 $\zeta$                              | ✓ | 36 | 4.66 | 27.96  | 4.65 | gj 170194925 | 42  | 3 | 15% | Signaling         |
| 105 | Myosin regulatory light chain               | ✓ | 21 | 4.20 | 22.58  | 4.70 | gj 170184074 | 206 | 3 | 8%  | Thick filament    |
| 106 | Glyceraldehyde-3-phosphate dehydrogenase    | ✓ | 40 | 6.88 | 18.66  | 5.58 | gj 170197231 | 344 | 3 | 24% | Energy metabolism |
| 107 | Arginine kinase                             | ✓ | 38 | 6.86 | 46.00  | 4.90 | gj 170186144 | 263 | 7 | 30% | Phosphotransfer   |
| 108 | Arginine kinase                             | ✓ | 35 | 6.64 | 46.00  | 4.90 | gj 170186144 | 457 | 9 | 30% | Phosphotransfer   |
| 109 | Arginine kinase                             | ✓ | 35 | 6.80 | 46.00  | 4.90 | gj 170186144 | 241 | 6 | 29% | Phosphotransfer   |
| 110 | Arginine kinase                             | ✓ | 35 | 6.66 | 46.00  | 4.90 | gj 170186144 | 386 | 9 | 30% | Phosphotransfer   |
| 111 | Arginine kinase                             | ✓ | 35 | 6.84 | 46.00  | 4.90 | gj 170186144 | 153 | 4 | 19% | Phosphotransfer   |
| 112 | Triose-phosphate isomerase                  | ✓ | 34 | 6.87 | 28.99  | 5.83 | gj 170207221 | 119 | 3 | 16% | Energy metabolism |
| 113 | Arginine kinase                             | ✓ | 33 | 6.79 | 46.00  | 4.90 | gj 170186144 | 341 | 8 | 34% | Phosphotransfer   |
| 114 | Arginine kinase                             | ✓ | 33 | 6.63 | 46.00  | 4.90 | gj 170186144 | 298 | 8 | 30% | Phosphotransfer   |
| 115 | Arginine kinase                             | ✓ | 31 | 6.63 | 46.00  | 4.90 | gj 170186144 | 277 | 7 | 29% | Phosphotransfer   |
| 116 | Arginine kinase                             | ✓ | 40 | 6.81 | 46.00  | 4.90 | gj 170186144 | 382 | 9 | 30% | Phosphotransfer   |
| 118 | Paramyosin                                  | ✓ | 44 | 6.68 | 103.69 | 5.55 | gj 170186119 | 142 | 3 | 18% | Thick filament    |
| 119 | Muscle myosin heavy chain                   | ✓ | 95 | 5.53 | 135.52 | 5.49 | gj 170208087 | 113 | 3 | 21% | Thick filament    |
| 120 | Muscle myosin heavy chain                   | ✓ | 95 | 5.49 | 135.52 | 5.49 | gj 170208087 | 70  | 2 | 10% | Thick filament    |
| 123 | Myosin heavy chain type 1                   | ✓ | 75 | 5.50 | 219.58 | 5.76 | gj 170219699 | 65  | 2 | 10% | Thick filament    |
| 125 | Gelsolin-like isoform 1                     | ✓ | 90 | 5.03 | 44.36  | 7.68 | gj 170227754 | 44  | 2 | 12% | Actin-binding     |
| 126 | Muscle myosin heavy chain                   | ✓ | 20 | 5.36 | 135.52 | 5.49 | gj 170208087 | 110 | 3 | 15% | Thick filament    |
| 127 | Sarcomeric $\alpha$ -actinin                | ✓ | 63 | 5.21 | 97.75  | 6.04 | gj 170222152 | 295 | 6 | 30% | Actin-binding     |
| 128 | $\alpha/\beta$ -Actin                       | ✓ | 50 | 6.09 | 41.91  | 5.16 | gj 170190957 | 374 | 6 | 18% | Thin filament     |
| 129 | Enolase                                     | ✓ | 43 | 6.30 | 47.24  | 6.18 | gj 170237664 | 321 | 7 | 38% | Energy metabolism |
| 130 | Glyceraldehyde-3-phosphate dehydrogenase    | ✓ | 40 | 6.56 | 18.66  | 5.58 | gj 170197231 | 348 | 4 | 24% | Energy metabolism |
| 131 | Fast myosin heavy chain                     | ✓ | 41 | 6.40 | 47.85  | 5.24 | gj 170220415 | 146 | 2 | 26% | Thick filament    |
| 132 | $\alpha/\beta$ -Actin                       | ✓ | 53 | 6.11 | 41.91  | 5.16 | gj 170190957 | 400 | 7 | 21% | Thin filament     |
| 133 | Troponin T                                  | ✓ | 53 | 6.15 | 45.88  | 4.97 | gj 170228768 | 120 | 2 | 15% | Thin filament     |
| 134 | Arginine kinase                             | ✓ | 37 | 6.63 | 46.00  | 4.90 | gj 170186144 | 366 | 9 | 30% | Phosphotransfer   |
| 135 | $\alpha/\beta$ -Actin                       | ✓ | 50 | 6.27 | 41.91  | 5.16 | gj 170190957 | 226 | 5 | 12% | Thin filament     |
| 136 | $\alpha/\beta$ -Actin                       | ✓ | 50 | 6.19 | 41.91  | 5.16 | gj 170190957 | 388 | 6 | 18% | Thin filament     |
| 137 | Pyruvate dehydrogenase E1 $\alpha$ -subunit | ✓ | 45 | 6.23 | 43.20  | 7.58 | gj 170183821 | 49  | 2 | 10% | Energy metabolism |
| 138 | Hemocyanin                                  | ✓ | 45 | 6.28 | 75.27  | 5.52 | gj 170187274 | 209 | 4 | 18% | Respiratory       |
| 139 | Notch-type protein                          | ✓ | 67 | 6.62 | 44.88  | 7.22 | gj 170248782 | 130 | 6 | 28% | Signaling         |
| 141 | Filamin-C                                   | ✓ | 66 | 6.53 | 249.86 | 6.12 | gj 170202097 | 80  | 2 | 9%  | Actin-binding     |
| 142 | Filamin-A                                   | ✓ | 61 | 6.65 | 287.86 | 6.61 | gj 170203114 | 76  | 2 | 8%  | Actin-binding     |
| 143 | Phosphoglycerate kinase-like                | ✓ | 54 | 6.61 | 53.54  | 9.17 | gj 170203088 | 229 | 6 | 27% | Energy metabolism |
| 145 | Arginine kinase                             | ✓ | 46 | 6.57 | 46.00  | 4.90 | gj 170186144 | 151 | 4 | 16% | Phosphotransfer   |
| 146 | Filamin                                     | ✓ | 83 | 6.82 | 249.86 | 6.12 | gj 170220786 | 86  | 2 | 11% | Actin-binding     |
| 148 | Cardiac-like muscle actin                   | ✓ | 53 | 6.21 | 41.65  | 5.23 | gj 170182268 | 169 | 2 | 11% | Thin filament     |
| 149 | Enolase                                     | ✓ | 53 | 6.72 | 39.85  | 5.45 | gj 170254092 | 161 | 4 | 19% | Energy metabolism |
| 150 | Cardiac-like muscle actin                   | ✓ | 41 | 5.75 | 41.65  | 5.23 | gj 170182268 | 162 | 3 | 14% | Thin filament     |
| 153 | Arginine kinase                             | ✓ | 31 | 5.93 | 46.00  | 4.90 | gj 170186144 | 264 | 7 | 33% | Phosphotransfer   |
| 154 | Arginine kinase                             | ✓ | 32 | 6.86 | 46.00  | 4.90 | gj 170200859 | 391 | 8 | 29% | Phosphotransfer   |
| 155 | Triose-phosphate isomerase                  | ✓ | 31 | 6.85 | 26.98  | 5.87 | gj 170254610 | 233 | 4 | 26% | Energy metabolism |
| 156 | Arginine kinase                             | ✓ | 29 | 6.17 | 46.00  | 4.90 | gj 170186144 | 88  | 3 | 14% | Phosphotransfer   |
| 157 | Troponin T                                  | ✓ | 28 | 5.82 | 45.58  | 4.97 | gj 170228768 | 96  | 2 | 11% | Thin filament     |
| 158 | Adenylylate kinase                          | ✓ | 28 | 6.65 | 29.30  | 8.05 | gj 170218197 | 502 | 8 | 27% | Phosphotransfer   |
| 159 | Arginine kinase                             | ✓ | 28 | 5.65 | 46.00  | 4.90 | gj 170183164 | 137 | 3 | 9%  | Phosphotransfer   |
| 160 | Hemocyanin subunit 1                        | ✓ | 27 | 6.15 | 25.41  | 5.99 | gj 170195414 | 168 | 4 | 17% | Respiratory       |
| 161 | $\alpha/\beta$ -Actin                       | ✓ | 25 | 5.77 | 41.91  | 5.16 | gj 170182624 | 217 | 4 | 20% | Thin filament     |

Table S1 continued

|     |                                          |   |     |      |        |      |              |     |   |     |                   |
|-----|------------------------------------------|---|-----|------|--------|------|--------------|-----|---|-----|-------------------|
| 162 | Arginine kinase                          | ✓ | 22  | 5.60 | 46.00  | 4.90 | gi 170183164 | 206 | 4 | 9%  | Phosphotransfer   |
| 163 | Arginine kinase                          | ✓ | 21  | 5.57 | 46.00  | 4.90 | gi 170183164 | 353 | 5 | 21% | Phosphotransfer   |
| 164 | Myosin regulatory light chain            | ✓ | 21  | 4.14 | 22.58  | 4.70 | gi 170184074 | 176 | 3 | 8%  | Thick filament    |
| 165 | Arginine kinase                          | ✓ | 20  | 5.21 | 46.00  | 4.90 | gi 170183164 | 62  | 2 | 6%  | Phosphotransfer   |
| 167 | Glyceraldehyde-3-phosphate dehydrogenase | ✓ | 20  | 6.55 | 18.66  | 5.58 | gi 170197231 | 172 | 3 | 21% | Energy metabolism |
| 168 | Troponin T                               | ✓ | 52  | 6.80 | 45.88  | 4.97 | gi 170228768 | 45  | 2 | 8%  | Thin filament     |
| 178 | Slow muscle myosin S1 heavy chain        | ✓ | 66  | 5.51 | 58.53  | 5.22 | gi 170194515 | 148 | 4 | 14% | Thick filament    |
| 179 | Hemocyanin subunit 4                     | ✓ | 65  | 5.47 | 77.04  | 5.30 | gi 170214816 | 96  | 3 | 13% | Respiratory       |
| 180 | $\alpha/\beta$ -Actin                    | ✓ | 53  | 4.91 | 41.91  | 5.16 | gi 170190957 | 223 | 6 | 18% | Thin filament     |
| 183 | Arginine kinase                          | ✓ | 29  | 5.69 | 46.00  | 4.90 | gi 170183164 | 373 | 5 | 22% | Phosphotransfer   |
| 184 | Arginine kinase                          | ✓ | 23  | 5.17 | 46.00  | 4.90 | gi 170183164 | 90  | 3 | 10% | Phosphotransfer   |
| 185 | $\alpha/\beta$ -Actin                    | ✓ | 20  | 5.10 | 41.91  | 5.16 | gi 170190957 | 151 | 4 | 6%  | Thin filament     |
| 187 | Hemocyanin                               | ✓ | 24  | 6.75 | 75.27  | 5.52 | gi 170187274 | 215 | 5 | 17% | Respiratory       |
| 189 | Paramyosin (long form)                   | ✓ | 67  | 6.19 | 103.02 | 5.83 | isotig00035  | 62  | 2 | 0%  | Thick filament    |
| 192 | Tropomyosin (slow muscle isoform)        | ✓ | 47  | 4.48 | 32.89  | 4.74 | gi 170187278 | 348 | 7 | 26% | Thin filament     |
| 193 | F1-ATP synthase $\beta$ -subunit         | ✓ | 68  | 6.13 | 55.80  | 5.31 | gi 170221081 | 361 | 7 | 33% | Energy metabolism |
| 194 | Myosin heavy chain type 1                | ✓ | 81  | 5.55 | 219.58 | 5.76 | gi 170219699 | 64  | 2 | 10% | Thick filament    |
| 198 | Myosin regulatory light chain            | ✓ | 20  | 4.12 | 22.58  | 4.70 | gi 170184074 | 311 | 6 | 14% | Thick filament    |
| 200 | Myosin heavy chain type 1                | ✓ | 95  | 5.63 | 219.58 | 5.76 | gi 170219699 | 100 | 2 | 9%  | Thick filament    |
| 203 | $\alpha/\beta$ -Actin                    | ✓ | 50  | 5.90 | 41.91  | 5.16 | gi 170190957 | 380 | 6 | 18% | Thin filament     |
| 204 | Tropomyosin (slow muscle isoform)        | ✓ | 47  | 4.51 | 32.89  | 4.74 | gi 170187278 | 407 | 8 | 27% | Thin filament     |
| 320 | Fructose 1,6-bisphosphate aldolase       | ✓ | 15  | 5.44 | 25.64  | 5.47 | gi 170216091 | 287 | 5 | 31% | Energy metabolism |
| 387 | $\alpha/\beta$ -Actin                    | ✓ | 58  | 5.28 | 41.91  | 5.16 | gi 170190957 | 193 | 6 | 15% | Thin filament     |
| 439 | Myosin heavy chain type B                | ✓ | 108 | 6.10 | 218.87 | 6.00 | gi 170211824 | 42  | 2 | 8%  | Thick filament    |
